# Supplementary material for: Functional characterization of two rare BCR–FGFR1+ leukemias
Source: PubMed Central journal article supplement (PMC7133745; doi:10.1101/mcs.a004838), 2020-04
Supplement: supp_mcs.a004838_Supplemental_Table_1.pdf [file supp_mcs.a004838_Supplemental_Table_1.pdf]

**Supplemental Table 1:** Previous Literature Reports of BCR-FGFR1 EMS

| Author, Year                | Age (years), sex | Clinical Manifestation at time of Diagnosis | Chromosomal Abnormalities                                                      | FISH Confirmation | RT-PCR Confirmation |
|-----------------------------|------------------|---------------------------------------------|--------------------------------------------------------------------------------|-------------------|---------------------|
| Fioretos, 2001              | 75, M            | MPN                                         | t(8;22) (p11.2;q11.2), t(9;21)(q34;q22)                                        | Yes               | Yes                 |
| Demiroglu, 2001             | 65, F            | MPN                                         | t(8;22) (p11.2;q11.2)                                                          | Yes               | Yes                 |
|                             | 51, F            | MPN                                         | t(8;22) (p11.2;q11.2)                                                          | Yes               | Yes                 |
| Pini, 2002                  | 74, F            | MPN                                         | t(8;22) (p11.2;q11.2)                                                          | Yes               | Yes                 |
| Murati, 2005                | 68, M            | MPN/B-ALL                                   | t(8;22) (p11.2;q11.2)                                                          | No                | Yes                 |
| Agerstam, 2007              | 58, F            | MPN                                         | t(8;22) (p11.2;q11.2)                                                          | Yes               | No                  |
| Lee, 2008                   | 50, F            | MPN/B-ALL                                   | t(8;22) (p11.2;q11.2)[9]/idem,i(9)(q10)[11]                                    | No                | No                  |
| Richebourg, 2008            | 56, F            | MPN                                         | t(8;22) (p11.2;q11.2)                                                          | Yes               | Yes                 |
| Patnaik, 2010               | 57, F            | MPN                                         | t(8;22) (p11.2;q11.2)                                                          | Yes               | No                  |
| Baldazzi, 2010              | 70, F            | MPN/B-ALL                                   | t(8;22) (p11.2;q11.2)[10]/idem,del(3)(p11p21) del(7)(p12p15),add(8)(p23),-9[6] | Yes               | Yes                 |
| Kim, 2011                   | 59, M            | Myeloid and T-cell Neoplasm                 | t(8;22) (p11.2;q11.2)+19[16]                                                   | Yes               | Yes                 |
| Wakim, 2011                 | 43, M            | MPN/B-ALL                                   | t(6;11)(q11;p13),-7,t(8;22)(p11.2;q11.2), del(9)(p13p22)[11]                   | Yes               | No                  |
| Dolan, 2012                 | 8, M             | MPN                                         | Inv(4)(p15.2q13)t(8;22;14)9p11.2;q11.2;q24[19]                                 | Yes               | Yes                 |
| Haslam, 2012                | 21, M            | MPN/B-ALL                                   | t(8;22)(p12;q11)[8]/45,idem,der(3;9)(q10;q10), dic(7;11)(p11;q13),tr [cp3]     | Yes               | Yes                 |
| Morishige, 2012             | 50, M            | MPN/T-cell Neoplasm                         | t(8;22) (p12;q11)                                                              | Yes               | Yes                 |
| Shimanuki, 2013             | 58 F             | B-ALL                                       | t(8;22)(p11.2;q11.2)-16, add(19)(p13)[16]                                      | No                | Yes                 |
| Matikas, 2013               | 74, F            | Undetermined                                | del(5)(q33q35)t(8;22)(p11.2;q11.2)                                             | Yes               | No                  |
| Wang, 2016                  | 56, F            | B-ALL                                       | t(8;22)(p11.2;q11.2)[9]/idem,+der(22)t(8;22)[10]                               | Yes               | No                  |
| Khodadoust, 2016            | 47, M            | MPN                                         | t(8;22) (p11.2;q11.2)[10]                                                      | Yes               | Yes                 |
| Landberg, 2017              | 21, M            | CML                                         | del(3)(q13q26),der(8)t(3;8)(?q;?p11)t(3;22)(?q;?q11) der(22)t(8;22)(p11;q11)   | Yes               | Yes                 |
| Montenegro-Garraud, 2017    | 41, F            | MPN/B-ALL                                   | t(8;22) (p11.2;q11.2)[7]                                                       | Yes               | No                  |
|                             | 66, M            | MPN/B-ALL                                   | t(8;22) (p11.2;q11.2)[15]                                                      | Yes               | No                  |
| Liu, 2018                   | 41, M            | CML                                         | t(8;22) (p11;q11)                                                              | Yes               | Yes                 |
| Villafuerte-Gutiérrez, 2018 | 66, M            | CML                                         | t(8;22) (p11;q11)[19]                                                          | Yes               | No                  |
| Verstovsek, 2018            | 39, F            | Myeloid-Lymphoid Neoplasm                   | t(8;22) (p11;q11)                                                              | Unknown           | Unknown             |
|                             | 68, F            | Myeloid-Lymphoid Neoplasm                   | t(8;22) (p11;q11)                                                              | Unknown           | Unknown             |
| Konishi, 2019               | 48, M            | MPN/B-ALL                                   | t(8;22) (p11;q11)                                                              | Yes               | Yes                 |
| Case 1, 2019                | 58, M            | AML                                         | t(8;22) (p11;q11) +19[20]                                                      | Yes               | Yes                 |
| Case 2, 2019                | 72, F            | B-ALL                                       | t(8;22) (p11.2;q11.2), del(16) (q22)[9]/ idem, del(7)(p13), del 9(p22) [5]     | Yes               | Yes                 |

MPN=Mixed Phenotype Neoplasm; Idem=Cytogenetic findings seen in the first karyotype
