# Supplementary material for: Functional characterization of two rare BCR–FGFR1+ leukemias
Source: PubMed Central journal article supplement (PMC7133745; doi:10.1101/mcs.a004838), 2020-04
Supplement: supp_mcs.a004838_Supplemental_Table_3.pdf [file supp_mcs.a004838_Supplemental_Table_3.pdf]

**Supplemental Table 3: Summary of genes tested in mutation panels**

| Case 1:<br>GeneTrails Hematologic Malignancies 76 Gene<br>Panel (Knight Diagnostics) |        |        |         | Case 2:<br>Oncogene Panel (Knight Diagnostics) |        |       |        |
|--------------------------------------------------------------------------------------|--------|--------|---------|------------------------------------------------|--------|-------|--------|
| ABL1                                                                                 | ATM    | BRAF   | CALR    | ABL                                            | AKT1   | AKT2  | AKT3   |
| CRLF2                                                                                | CSF3R  | FLT3   | GNA13   | BRAF                                           | CBL    | CBLB  | FBXW7  |
| HRAS                                                                                 | IL7R   | JAK1   | JAK2    | FES                                            | FGFR4  | FLT3  | FMS    |
| JAK3                                                                                 | KIT    | KRAS   | MPL     | GATA1                                          | HRAS   | IDH1  | IDH2   |
| MYD88                                                                                | NOTCH1 | NOTCH2 | NRAS    | JAK1                                           | JAK2   | JAK3  | KIT    |
| SOCS1                                                                                | STAT3  | PTPN11 | ASXL1   | KRAS                                           | MET    | MPL   | NOTCH1 |
| CREBBP                                                                               | EP300  | EZH2   | KDM6A   | NPM1                                           | NRAS   | NTRK1 | PAX5   |
| PTEN                                                                                 | SUZ12  | DNMT3A | TET2    | PDGFRB                                         | PTPN11 | SOS1  |        |
| IDH1                                                                                 | IDH2   | BCOR   | BCL6    |                                                |        |       |        |
| CBL                                                                                  | CBLB   | CEBPA  | ETV6    |                                                |        |       |        |
| FOXO1                                                                                | GATA1  | GATA2  | ID3     |                                                |        |       |        |
| IKZF1                                                                                | KMT2D  | MEF2B  | MYC     |                                                |        |       |        |
| PAX5                                                                                 | PRDM1  | RUNX1  | TCF3    |                                                |        |       |        |
| SRSF2                                                                                | SF3B1  | U2AF1  | ZRSR2   |                                                |        |       |        |
| SMC1A                                                                                | SMC3   | STAG2  | RAD21   |                                                |        |       |        |
| TP53                                                                                 | WT1    | PHF6   | BCL2    |                                                |        |       |        |
| BIRC3                                                                                | CARD11 | CD79B  | FAM5C   |                                                |        |       |        |
| FBXW7                                                                                | HNRNPK | NPM1   | TNFAIP3 |                                                |        |       |        |
| TNFRSF14                                                                             | SETBP1 |        |         |                                                |        |       |        |

More Information about panels can be found at: <https://knightdxlabs.ohsu.edu/>
